# Supplementary material for: A Mediterranean Dietary Pattern Predicts Better Sleep Quality in US Women from the American Heart Association Go Red for Women Strategically Focused Research Network
Source: PubMed Central journal article supplement (PMC7551612; doi:10.3390/nu12092830), 2020-09-16
Supplement: nutrients-12-02830-s001.pdf [file nutrients-12-02830-s001.pdf]

**Supplementary Table 1.** Prospective associations of an aMed dietary pattern with measures of sleep quality after 1-y (unadjusted models)<sup>a</sup>

| Predictor                                                              | Outcome             | $\beta$ (SE) | P-value          |
|------------------------------------------------------------------------|---------------------|--------------|------------------|
| <b>Overall diet score and food sources included in the diet score</b>  |                     |              |                  |
| <b>aMed diet score</b>                                                 | PSQI total score    | -0.25 (0.10) | <b>0.02*</b>     |
|                                                                        | Sleep onset latency | -0.45 (0.66) | 0.50             |
|                                                                        | Sleep efficiency    | 1.06 (0.35)  | <b>&lt;0.01*</b> |
|                                                                        | Sleep disturbances  | -0.22 (0.13) | 0.09             |
| <b>Fruits and vegetables</b>                                           | PSQI total score    | -0.16 (0.07) | <b>0.02*</b>     |
|                                                                        | Sleep onset latency | -0.47 (0.44) | 0.31             |
|                                                                        | Sleep efficiency    | 0.58 (0.24)  | <b>0.01*</b>     |
|                                                                        | Sleep disturbances  | -0.17 (0.09) | 0.05             |
| <b>Legumes</b>                                                         | PSQI total score    | -0.02 (0.16) | 0.92             |
|                                                                        | Sleep onset latency | -0.86 (1.03) | 0.40             |
|                                                                        | Sleep efficiency    | 1.09 (0.55)  | <b>&lt;0.05*</b> |
|                                                                        | Sleep disturbances  | 0.27 (0.21)  | 0.19             |
| <b>Nuts</b>                                                            | PSQI total score    | 0.09 (0.22)  | 0.66             |
|                                                                        | Sleep onset latency | 0.33 (1.36)  | 0.81             |
|                                                                        | Sleep efficiency    | -0.73 (0.73) | 0.31             |
|                                                                        | Sleep disturbances  | -0.14 (0.27) | 0.61             |
| <b>Dark breads</b>                                                     | PSQI total score    | -0.58 (0.39) | 0.14             |
|                                                                        | Sleep onset latency | -0.23 (2.48) | 0.93             |
|                                                                        | Sleep efficiency    | 2.00 (1.33)  | 0.13             |
|                                                                        | Sleep disturbances  | -0.13 (0.50) | 0.79             |
| <b>Fish</b>                                                            | PSQI total score    | 0.01 (0.01)  | 0.57             |
|                                                                        | Sleep onset latency | 0.03 (0.07)  | 0.68             |
|                                                                        | Sleep efficiency    | -0.03 (0.04) | 0.44             |
|                                                                        | Sleep disturbances  | -0.00 (0.01) | 0.90             |
| <b>Red meat</b>                                                        | PSQI total score    | -0.03 (0.13) | 0.79             |
|                                                                        | Sleep onset latency | -0.19 (0.80) | 0.81             |
|                                                                        | Sleep efficiency    | -0.08 (0.43) | 0.85             |
|                                                                        | Sleep disturbances  | 0.00 (0.16)  | 0.99             |
| <b>Major nutrients in food sources included in the aMed diet score</b> |                     |              |                  |
| <b>MUFA to SFA ratio</b>                                               | PSQI total score    | -0.84 (0.42) | <b>&lt;0.05*</b> |
|                                                                        | Sleep onset latency | -2.86 (2.68) | 0.29             |
|                                                                        | Sleep efficiency    | 2.80 (1.44)  | 0.05             |
|                                                                        | Sleep disturbances  | -1.01 (0.53) | 0.06             |
| <b>Unsaturated fat</b>                                                 | PSQI total score    | -0.07 (0.03) | <b>0.03*</b>     |
|                                                                        | Sleep onset latency | -0.49 (0.19) | <b>&lt;0.01*</b> |

|                       |                     |              |                   |
|-----------------------|---------------------|--------------|-------------------|
|                       | Sleep efficiency    | 0.12 (0.10)  | 0.25              |
|                       | Sleep disturbances  | -0.05 (0.04) | 0.23              |
| <b>Saturated fat</b>  | PSQI total score    | -0.02 (0.05) | 0.77              |
|                       | Sleep onset latency | -0.45 (0.33) | 0.17              |
|                       | Sleep efficiency    | -0.02 (0.18) | 0.89              |
|                       | Sleep disturbances  | 0.06 (0.07)  | 0.41              |
| <b>Plant protein</b>  | PSQI total score    | -0.17 (0.09) | 0.08              |
|                       | Sleep onset latency | -0.13 (0.60) | 0.82              |
|                       | Sleep efficiency    | 1.07 (0.32)  | <b>&lt;0.001*</b> |
|                       | Sleep disturbances  | -0.16 (0.12) | 0.17              |
| <b>Animal protein</b> | PSQI total score    | -0.01 (0.04) | 0.80              |
|                       | Sleep onset latency | -0.16 (0.26) | 0.55              |
|                       | Sleep efficiency    | 0.00 (0.14)  | 0.99              |
|                       | Sleep disturbances  | -0.03 (0.05) | 0.60              |
| <b>Fiber</b>          | PSQI total score    | -0.06 (0.04) | 0.07              |
|                       | Sleep onset latency | -0.20 (0.23) | 0.37              |
|                       | Sleep efficiency    | 0.34 (0.12)  | <b>&lt;0.01*</b>  |
|                       | Sleep disturbances  | -0.07 (0.05) | 0.11              |
| <b>Alcohol</b>        | PSQI total score    | 0.02 (0.03)  | 0.42              |
|                       | Sleep onset latency | 0.15 (0.18)  | 0.42              |
|                       | Sleep efficiency    | -0.08 (0.10) | 0.43              |
|                       | Sleep disturbances  | 0.01 (0.04)  | 0.72              |

<sup>a</sup>Univariate linear regression models with no adjustment for confounding variables
